# Supplementary material for: Effects of Albumin on Survival after a Hepatic Encephalopathy Episode: Randomized Double-Blind Trial and Meta-Analysis
Source: MDPI journal article supplement (doi:10.3390/jcm10214885), 2021-10-23
Supplement: s1 [file s1]

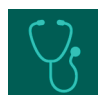

## Supplementary online material

### Supplementary methods

**ALFAE inclusion and exclusion criteria** Inclusion criteria were: liver cirrhosis; development of an episode of HE that was initiated within 72 h of inclusion into the study and persisted on grade 2 (West-Haven scale); age between 18 and 85 years and a signed consent. Exclusion were: terminal illness, need for intensive support (ventilation, dialysis, vasopressors, etc.); psychiatric or neurological conditions that make the assessment of HE difficult; disorders requiring treatment with albumin, contraindications to albumin, active gastrointestinal bleeding in the previous 72 h, acute-on-chronic liver failure (ACLF) defined by an acute decompensation associated with bilirubin >5 mg/dl.

**Visits protocol** All the visits included a physical exam with evaluation of overt HE (West Haven and Clinical hepatic encephalopathy staging CHES scales,) and minimal hepatic encephalopathy (MHE), laboratory tests and evaluation of adverse events (AEs) (causal relation with the study medication was). MHE was assessed with the Psychometric hepatic encephalopathy score (PHES). Patients were followed during a 6-month period or until dead or receiving a liver transplant with monthly visits during the first three months and telephonic controls thereafter. The last visit was performed at day 180.

**Table S1.** List of participant centres.

| Center                                            | City             |
|---------------------------------------------------|------------------|
| Hospital Universitari de la Vall d'Hebron         | Barcelona        |
| Hospital Universitari de la Santa Creu i Sant Pau | Barcelona        |
| Hospital Germans Trias i Pujol                    | Badalona         |
| Hospital Universitari Parc Taulí                  | Parc Taulí       |
| Hospital del Mar                                  | Barcelona        |
| Hospital Broggi                                   | Sant Joan d'Espí |
| Hospital Clínic                                   | Barcelona        |
| Hospital Gregorio Marañón                         | Madrid           |
| Hospital Puerta del Hierro                        | Madrid           |
| Hospital Marqués de Valdecillas                   | Santander        |
| Hospital Universitario Ramón y Cajal              | Madrid           |
| Hospital Universitari Bellvitge                   | Barcelona        |
| Hospital de Terrassa                              | Terrassa         |
| Hospital Virgen del Rocío                         | Sevilla          |

**Table S2.** Baseline characteristics of ALFAE and BETA studies.

|                    | BETA<br>Placebo group | BETA<br>Albumin<br>group | ALFAE<br>Placebo group | ALFAE<br>Albumin<br>group | P<br>between<br>all<br>ALFAE<br>and BETA<br>studies | P<br>Between<br>both<br>Placebo<br>groups | P<br>Between<br>both<br>Albumin<br>groups |
|--------------------|-----------------------|--------------------------|------------------------|---------------------------|-----------------------------------------------------|-------------------------------------------|-------------------------------------------|
|                    | <i>n</i> = 42         | <i>n</i> = 40            | <i>n</i> = 30          | <i>n</i> = 26             |                                                     |                                           |                                           |
| Male, <i>n</i> (%) | 26(61.9)              | 29(72.5)                 | 23(76.7)               | 19(73.1)                  | 0.5                                                 | 1                                         | 0.2                                       |
| Age, median (IQR)  | 69.1(63.3–75.3)       | 66.5(59.9–73.6)          | 66(61–72)              | 62(56–73)                 | 0.3                                                 | 0.5                                       | 0.4                                       |

|                                            |                    |                  |                     |                 |       |       |       |
|--------------------------------------------|--------------------|------------------|---------------------|-----------------|-------|-------|-------|
| <b>Ideal weight, median (IQR)</b>          | 65.9<br>(61–79.2)  | 63<br>(55–68)    | 69.2<br>(62.3–73.5) | 65<br>(62–70)   | 0.2   | 0.053 | 0.3   |
| <b>Etiology, n(%)</b>                      |                    |                  |                     |                 |       |       |       |
| Alcohol related                            | 22(52.3)           | 19(47.5)         | 17(56.7)            | 7(26.9)         | 0.5   | 0.8   | 0.1   |
| MAFL                                       | 2(4.8)             | 4(10)            | --                  | --              | 0.08  | 0.5   | 0.1   |
| Alcohol and HCV                            | 4(9.5)             | 6(15)            | 2(6.7)              | 5(19.2)         | 1     | 1     | 0.7   |
| HCV                                        | 5(11.9)            | 6(15)            | 10(33.3)            | 8(30.7)         | 0.01  | 0.04  | 0.1   |
| Alcohol and MAFL                           | 2(4.8)             | --               | --                  | --              | 0.5   | 0.5   | --    |
| Other *                                    | 7(16.6)            | 5(12.5)          | 1                   | 6               | 0.6   | 0.1   | 0.7   |
| <b>Previous decompensations</b>            |                    |                  |                     |                 |       |       |       |
| Ascites                                    | 35(83.3)           | 30(75)           | 27 (90)             | 20 (76.9)       | 0.5   | 0.5   | 1     |
| Hepatic encephalopathy                     | 27(64.3)           | 26(65)           | 22(73.3)            | 14 (53.8)       | 1     | 0.5   | 0.4   |
| Spontaneous bacterial peritonitis          | 7(16.7)            | 7(17.5)          | 9 (30.0)            | 4 (15.4)        | 0.4   | 0.3   | 1     |
| Gastrointestinal bleeding                  | 11(26.2)           | 11(27.6)         | 11 (36.7)           | 5 (19.2)        | 0.8   | 0.4   | 0.6   |
| Hepatorenal syndrome                       | 2(4.8)             | 3(7.5)           | 1 (3.3)             | 2 (7.7)         | 1     | 1     | 1     |
| Hepatocellular carcinoma                   | 5(11.9)            | 4(10)            | 6(20)               | 3 (11.5)        | 0.6   | 0.7   | 1     |
| <b>Precipitating Factors</b>               |                    |                  |                     |                 |       |       |       |
| <b>**</b>                                  |                    |                  |                     |                 |       |       |       |
| Infections, n (%)                          | 11(26.1)           | 12(30)           | 14(53.8)            | 11(36.7)        | 0.048 | 0.08  | 0.4   |
| Constipation, n (%)                        | 9(21.4)            | 9(22.5)          | 12(30)              | 10(33.3)        | 0.6   | 1     | 0.6   |
| Dehydration, n (%)                         | 4(9.5)             | 3(7.7)           | 8(30.8)             | 10(33.3)        | 0.002 | 0.01  | 0.003 |
| Diuretic, n (%)                            | 14(33.3)           | 23(59)**         | 8(38.5)             | 10(53.3)        | 0.2   | 0.6   | 0.2   |
| <b>Laboratory parameters, median (IQR)</b> |                    |                  |                     |                 |       |       |       |
| Hemoglobin g/dL                            | 10.6(9.9–13)       | 10.9(9.3–11.8)   | 11(9.6–13.4)        | 10.7(9.7–12.3)  | 1     | 0.7   | 0.9   |
| Leukocytes x10 <sup>9</sup> /L             | 5.06(3.8–7.4)      | 5.09(4.06–6.6)   | 5.3(4.4–6.8)        | 5.3(4.4–7.9)    | 0.8   | 0.5   | 0.5   |
| Platelets x10 <sup>9</sup> /L              | 82.5(64–109)       | 76.5(57.5–106.5) | 105(80–134.7)       | 87.7(67.8–125)  | 0.03  | 0.05  | 0.2   |
| Sodium mEq/L                               | 135.8(132.8–138.6) | 136.2(134–139)   | 134.5(130–139)      | 134.5(126–140)  | 0.08  | 0.3   | 0.2   |
| AST IU/L                                   | 44(31–64)          | 51(36–75)        | 40(26–54)           | 45.5(29–81.7)   | 0.2   | 0.5   | 0.3   |
| ALT IU/L                                   | 26(18–35)          | 32.5(22–43.5)    | 23.5(15.3–35.5)     | 26.5(20–47.5)   | 0.2   | 0.5   | 0.4   |
| Bilirubin mg/dL                            | 3.2(1.7–4.6)       | 2.97(1.91–5)     | 2.1(1.3–2.9)        | 2.7(1.9–3.8)    | 0.018 | 0.014 | 0.3   |
| Albumin g/dL                               | 2.85(2.35–3.01)    | 2.6(2.41–2.93)   | 3.1(2.5–3.4)        | 2.85(2.4–3.3)   | 0.2   | 0.2   | 6     |
| INR                                        | 1.53(1.37–1.71)    | 1.55(1.35–1.83)  | 1.43(1.32–1.64)     | 1.6(1.37–1.78)  | 0.3   | 0.2   | 0.9   |
| Creatinine (mg/dL)                         | 1.08(0.77–1.53)    | 0.99(0.7–1.32)   | 1.38(0.89–1.6)      | 0.87(0.68–1.11) | 0.9   | 0.4   | 0.4   |
| MELD score                                 | 17 (16–20)         | 17(15–20)        | 15(11.8–20)         | 17(15–19)       | 0.2   | 0.04  | 0.3   |
| Child-Pugh score                           | 10(8–11)           | 10(8–11)         | 9(7–10)             | 8.5(7–10)       | 0.02  | 0.05  | 0.02  |

\*\* In 3 patients from the ALFAE study, precipitating factors could not be identified. \* Wilson, double viral etiology (HCV & HBV), triple etiology (HCV, HBV and OH), hemochromatosis and alfa-1 antitrypsin.

**Table S3.** Non-severe adverse events presented during the study.

| Organ system preferred term | Albumin *<br>n = 40 patients | Placebo **<br>n = 41 patients |
|-----------------------------|------------------------------|-------------------------------|
|-----------------------------|------------------------------|-------------------------------|

**Investigators**

|                    |    |   |
|--------------------|----|---|
| Hyperkalemia       | 1  | 1 |
| Hyponatremia       | 4  | 2 |
| Hyperbilirubinemia | 1  | 2 |
| Thrombocytopenia   | -- | 3 |

**Gastrointestinal disorders**

|                                   |    |   |
|-----------------------------------|----|---|
| Abdominal pain                    | 2  | 5 |
| Diarrhea                          | 4  | 1 |
| Constipation                      | 1  | 1 |
| Nausea-Vomiting                   | -- | 3 |
| GI bleeding                       | 2  |   |
| Hernia                            | -- | 1 |
| Colitis                           | -- |   |
| Gallbladder or choledochal stones | -- | 1 |
| Pancreatitis                      | 1  |   |

**Metabolism and nutrition disorders**

|                    |    |    |
|--------------------|----|----|
| Hyperglycemia      | 2  | 3  |
| Hypothyroidism     | -- | 1  |
| Nutrition disorder | 1  | -- |

**Blood and lymphatic system disorders**

|        |    |   |
|--------|----|---|
| Anemia | 14 | 9 |
|--------|----|---|

**Nervous system disorders**

|                           |    |    |
|---------------------------|----|----|
| Seizures                  | 1  | -- |
| Headache                  | 1  | 2  |
| Paresthesia               | 1  | -- |
| Gait disturbance          | 1  | -- |
| Cerebral ischemic disease | -- | 2  |

**Injury, poisoning and procedural complications**

|                                  |   |   |
|----------------------------------|---|---|
| Bone fractures and traumatisms * | 5 | 3 |
|----------------------------------|---|---|

**Vascular disorders**

|              |    |   |
|--------------|----|---|
| Hypertension | 1  | 3 |
| Hypotension  | 2  | 2 |
| Hematoma     | -- | 1 |

**General disorders and administration-site conditions**

|                                                |    |    |
|------------------------------------------------|----|----|
| General physical deterioration-unspecific pain | 3  | -- |
| Asthenia                                       | -- | 2  |

**Cirrhosis related \***

|                                     |    |    |
|-------------------------------------|----|----|
| Ascites                             | 14 | 24 |
| Oedemas                             | 4  | 6  |
| Hepatic encephalopathy              | 11 | 8  |
| Spontaneous Bacterial Peritonitis ♦ | 1  | 1  |
| Hepatorenal syndrome                | -- | 1  |
| Portal vein thrombosis              | 1  | -- |

**Infections and infestations**

|                                   |    |    |
|-----------------------------------|----|----|
| Genitourinary                     | 6  | 7  |
| Localized fungal infection        | 2* | 1  |
| Respiratory (bacterial or viral)  | 4  | 1  |
| Cellulitis or cutaneous infection | 2  | -- |

|                                                        |    |    |
|--------------------------------------------------------|----|----|
| Colonization by resistant bacteria                     | 1  | -- |
| Bacteraemia                                            | 3  | 1  |
| Phlebitis                                              | 2  | 2  |
| Gastroenteritis (viral)                                | 1  | -- |
| Conjunctivitis                                         | -- | 1  |
| <b>Renal and urinary disorders</b>                     |    |    |
| Hematuria                                              | -- | 2  |
| Acute kidney injury                                    | 10 | 2  |
| <b>Neoplasms benign, malignant and unspecified</b>     |    |    |
| Benign                                                 | -- | 1  |
| HCC novo or progression                                | 1  | 2  |
| <b>Respiratory, thoracic and mediastinal disorders</b> |    |    |
| Bronchospasm                                           | 1  | -- |
| Pleural effusion                                       | 1  | -- |
| Pulmonary Hypertension                                 | 1  | -- |
| Dyspnoea                                               | -- | 2  |
| Respiratory failure                                    | 2  | 4  |
| <b>Psychiatric disorders</b>                           |    |    |
| Insomnia                                               | 1  | -- |
| Depression                                             | -- | 1  |
| Confusion                                              | -- | 1  |
| <b>Skin and subcutaneous tissue disorders</b>          |    |    |
| Pruritus                                               | 1  | 1  |
| Psoriasis                                              | 1  | -- |
| Rash                                                   | -- | 1  |
| <b>Cardiac disorders</b>                               |    |    |
| Aortic valve disease                                   | 1  | -- |
| Heart failure                                          | 3  | -- |
| Bradycardia                                            | -- | 1  |

\* In the albumin group there were also one episode of: back pain, conjunctival hemorrhage, cough, electrolyte imbalance, skin neoplasm excision, muscle spasm, thermal burn, tongue ulceration, anal fissure, alcohol related liver decompensation, tremor and treponema test positive. ♦ Including one bacterioascites. \*vaginal and cutaneous. \*\* In the placebo group there were also one episode of anorexia, diabetic neuropathy, dizziness, dyslipidemia, unfocalized pain, perianal erythema, peritoneal hemorrhage, portal shunt, sciatica, syncope, diabetes, agitation, deep vein thrombosis, pyrosis, unspecific chest pain, coagulation worsening and urinary retention. None of the adverse events were considered to be related to the study medication.

**Table S4.** Adverse events that were considered as severe at least once during the study.

| Organ system preferred term       | Albumin                                                         | Placebo                                                         |
|-----------------------------------|-----------------------------------------------------------------|-----------------------------------------------------------------|
|                                   | <i>n</i> = 20 with at least one SAE<br>Recovery or ongoing/dead | <i>n</i> = 23 with at least one SAE<br>Recovery or ongoing/dead |
| <b>Investigators</b>              |                                                                 |                                                                 |
| Hyponatremia                      | 1/0                                                             | --                                                              |
| Hyperbilirubinemia                | --                                                              | 1/0                                                             |
| <b>Gastrointestinal disorders</b> |                                                                 |                                                                 |
| GI bleeding                       | --                                                              | 3/0                                                             |
| Hernia                            | 1/0                                                             | 1/0                                                             |
| Ischemic colitis                  | --                                                              | 0/1                                                             |

|                                                                                                                                                                   |     |     |
|-------------------------------------------------------------------------------------------------------------------------------------------------------------------|-----|-----|
| Gallbladder or choledochal stones                                                                                                                                 | 1/0 | 1/0 |
| Necrotizing esophagitis                                                                                                                                           | --  | 0/1 |
| <b>Blood and lymphatic system disorders</b>                                                                                                                       |     |     |
| Anemia                                                                                                                                                            | 5/0 | 2/0 |
| <b>Injury, poisoning and procedural complications</b>                                                                                                             |     |     |
| Bone fractures and traumatism                                                                                                                                     | 2/0 | 1/0 |
| <b>General disorders and administration-site conditions</b>                                                                                                       |     |     |
| Fatigue                                                                                                                                                           | 2/0 | --  |
| Multi-organ organ failure                                                                                                                                         | 0/1 | 0/1 |
| Malaise                                                                                                                                                           | --  | 1/1 |
| <b>Cirrhosis related</b>                                                                                                                                          |     |     |
| Ascites                                                                                                                                                           | 2/0 | 1/0 |
| Hepatic encephalopathy                                                                                                                                            | 8/2 | 9/2 |
| Spontaneous Bacterial Peritonitis                                                                                                                                 | 1/0 | 1/1 |
| Hepatorenal syndrome                                                                                                                                              | 1/3 | 1/0 |
| Acute-on-chronic liver failure                                                                                                                                    | 0/1 | 0/1 |
| Slow portal blood flow                                                                                                                                            | 1/0 | --  |
| <b>Infections and infestations</b>                                                                                                                                |     |     |
| Genitourinary                                                                                                                                                     | 1/0 | 2/1 |
| Respiratory                                                                                                                                                       | 2/0 | 1/0 |
| Cellulitis                                                                                                                                                        | 1/0 | 1/0 |
| Bacteraemia                                                                                                                                                       | 1/0 | 0/1 |
| Endocarditis                                                                                                                                                      | 0/1 | --  |
| Cholecystitis                                                                                                                                                     | 1/0 | 1/0 |
| Septic shock                                                                                                                                                      | --  | 1/2 |
| <b>Renal and urinary disorders</b>                                                                                                                                |     |     |
| Acute kidney injury                                                                                                                                               | 0/1 | 1/4 |
| <b>Neoplasms benign, malignant and unspecified</b>                                                                                                                |     |     |
| Basal cell carcinoma                                                                                                                                              | 1/0 | --  |
| HCC novo or progression                                                                                                                                           | 3/0 | --  |
| Lung neoplasm                                                                                                                                                     | 1/0 | --  |
| <b>Respiratory, thoracic and mediastinal disorders</b>                                                                                                            |     |     |
| Pulmonary Hypertension                                                                                                                                            | --  | 1/0 |
| Aspiration                                                                                                                                                        | --  | 1/0 |
| Pulmonary edema                                                                                                                                                   | 1/0 | --  |
| Respiratory failure                                                                                                                                               | --  | 0/1 |
| <b>Cardiac disorders</b>                                                                                                                                          |     |     |
| Bradycardia                                                                                                                                                       | 1/0 | --  |
| None of the adverse events were considered to be related to the study medication. Severe adverse event, SAE; Gastrointestinal, GI; hepatocellular carcinoma, HCC. |     |     |

Table S5. Time frame to death in both clinical trials.

| EXITUS<br>date | BETA albumin<br><i>n</i> = 40 | BETA placebo<br><i>n</i> = 42 | ALFAE treatment<br><i>n</i> = 26 | ALFAE<br>Placebo<br><i>n</i> = 30 |
|----------------|-------------------------------|-------------------------------|----------------------------------|-----------------------------------|
| 0–7 days       | --                            | 1                             | 1                                | --                                |
| 7–15 days      | --                            | 1                             | --                               | 1                                 |
| 15–28 days     | --                            | 2                             | 0                                | 3                                 |
| 29–60 days     | 2                             | 4                             | 3                                | 2                                 |

|             |   |    |    |    |
|-------------|---|----|----|----|
| 61–90 days  | 1 | -- | 2  | 8  |
| 91–180 days | 2 | 3  | -- | -- |

Table S6. Time frame to liver transplant.

| Transplant date | BETA albumin<br><i>n</i> = 40 | BETA placebo<br><i>n</i> = 42 | ALFAE treatment<br><i>n</i> = 26 | ALFAE Placebo<br><i>n</i> = 30 |
|-----------------|-------------------------------|-------------------------------|----------------------------------|--------------------------------|
| 0–7 days        | --                            | --                            | --                               | --                             |
| 7–15 days       | 1                             | --                            | --                               | --                             |
| 15–28 days      | 1                             | --                            | --                               | 1                              |
| 29–60 days      | --                            | --                            | --                               | 1                              |
| 61–90 days      | --                            | --                            | 1                                | 2                              |
| 91–180 days     | 1                             | 2                             | --                               | --                             |

Table S7. 90-days mortality risk factors for both cohorts.

| VARIABLE        | Multivariate Cox Regression |                   |                 |
|-----------------|-----------------------------|-------------------|-----------------|
|                 | HR                          | (95% CI)          | <i>p</i> -value |
| Treatment group | Placebo                     | 1                 | 0.004           |
|                 | Albumin                     | 0.18 (0.06; 0.57) |                 |
| Sodium          | 0.91                        | (0.85; 0.98)      | 0.012           |
| MELD            | 1.13                        | (1.01; 1.27)      | 0.034           |
| CHESS scale     | 1.31                        | (1.14; 1.52)      | <0.001          |

Harrell C = 0.7981, AIC model=175.7556, BIC model=186.59. Abbreviations Model for end stage of liver disease, MELD; Clinical hepatic encephalopathy staging scale, CHESS.

## BETA study

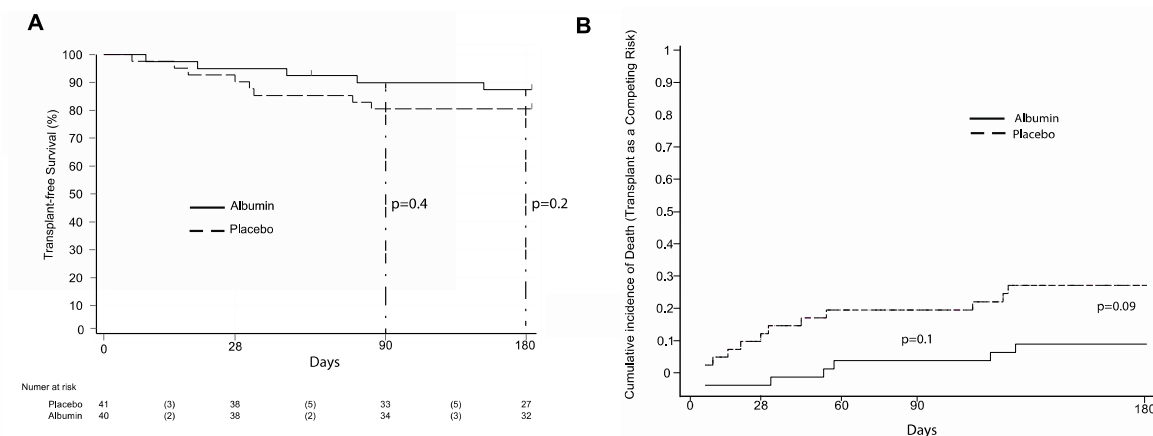

**Figure S1.** 180 days Transplant-free Survival and Cumulative incidence of Death with Transplant as a competing risk (A) Kaplan-Meier estimates of Transplant-free Survival at 180 days. (B) 180 days cumulative incidence of Death with Transplant as a competing risk
